# Supplementary material
Source: PubMed Central journal article supplement (PMC1366740)
Supplement: biophysj_105.066647_1.pdf [file biophysj_105.066647_1.pdf]

**Supplementary Material**

for

**A Computational Study of the Closed and Open States of the Influenza A M2  
Proton Channel**

*Yujie Wu and Gregory A. Voth\**

Center for Biophysical Modeling and Simulation and Department of Chemistry,

University of Utah, 315 S. 1400 E. Rm 2020,

Salt Lake City, Utah,

84112-0850

\* To whom correspondence should be addressed

Fax: 801-581-4353

Phone: 801-581-7272

E-mail: [voth@chemistry.utah.edu](mailto:voth@chemistry.utah.edu).

May, 2005

This supplementary material contains 1 figure (Figure S1) and three tables (Tables S1-S3) as follows.

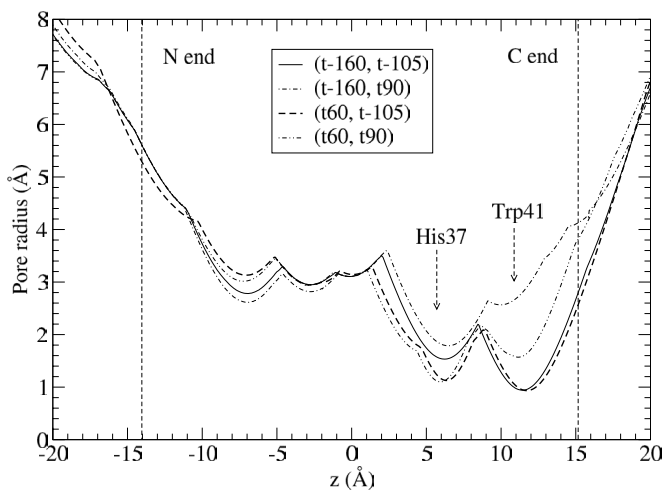

Figure S1. The pore radius profiles of the representative structures of the four different rotameric states of the M2-TMP channel, as calculated using the HOLE program (1).

**Table S1.** The different structures as used in Table S2.

| Structure <sup>*</sup> | $d_{SS}$ (Å) <sup>†</sup> | $d_{GG}$ (Å) <sup>‡</sup> | $d_{RR}$ (Å) <sup>¶</sup> | tilt (°)        | $\rho_0$ (°)      |
|------------------------|---------------------------|---------------------------|---------------------------|-----------------|-------------------|
| 1                      | 17.71                     | 7.26                      | 14.77                     | 38              | -43               |
| 2                      | 17.82                     | 7.29                      | 14.36                     | 38              | -43               |
| 3                      | 17.76                     | 7.15                      | 14.30                     | 38              | -43               |
| 4                      | 15.25                     | 7.4                       | 12.98                     | 30 <sup>§</sup> | -33 <sup>  </sup> |

<sup>\*</sup> The PDB files are provided for structure 1, 2, 3, and 4 as “1.pdb”, “2.pdb”, “3.pdb”, and “4.pdb”.

<sup>†</sup> The distance between the alpha-carbon atoms of the Ser23 residues from two neighboring helices.

<sup>‡</sup> The distance between the alpha-carbon atoms of the Gly34 residues from two neighboring helices.

<sup>¶</sup> The distance between the alpha-carbon atoms of the Arg45 residues from two neighboring helices.

<sup>§</sup> This value is within the range of the experimental values (30°~40°) (2-5)

<sup>||</sup> This value is within the *uncertainty of the experimental value (43±10°)* (5).

|        |
|--------|
| main 1 |
|--------|

**Table S2.** Estimated dipolar coupling for different rotameric states in slightly different overall structures, showing that a small uncertainty of the overall structure can have dramatic effects on the estimated  $^{15}\text{N}_\delta$ - $^{13}\text{C}_\gamma$  dipolar coupling such that the (t-160, t-105), (t-160, t90), and (t60, t90) states cannot be distinguished.

| Structure * | Rotameric states † | Dihedral angles (°) |          |          |          | $d_{\delta-\gamma}$<br>(Å) | $^{15}\text{N}_\delta$ - $^{13}\text{C}_\gamma$<br>dipolar<br>(Hz) ¶ | $^1\text{H}$ - $^{15}\text{N}_\delta$<br>dipolar<br>(kHz) § |
|-------------|--------------------|---------------------|----------|----------|----------|----------------------------|----------------------------------------------------------------------|-------------------------------------------------------------|
|             |                    | His37               |          | Trp41    |          |                            |                                                                      |                                                             |
|             |                    | $\chi_1$            | $\chi_2$ | $\chi_1$ | $\chi_2$ |                            |                                                                      |                                                             |
|             |                    |                     |          |          |          |                            |                                                                      |                                                             |
| 1           | (t-160, t-105)     | 170                 | 170      | 150      | 276      | 3.718826                   | 54.083694                                                            | -1.629635                                                   |
|             |                    | 170                 | 170      | 150      | 274      | 3.718827                   | 54.083652                                                            | -1.629588                                                   |
|             |                    | 170                 | 170      | 150      | 272      | 3.718828                   | 54.08363                                                             | -1.629534                                                   |
|             |                    | 170                 | 170      | 150      | 270      | 3.718828                   | 54.083611                                                            | -1.629478                                                   |
|             |                    | 170                 | 170      | 150      | 268      | 3.718829                   | 54.083569                                                            | -1.629423                                                   |
|             | (t-160, t90)       | 168                 | 150      | 150      | 100      | 3.429518                   | 69.743729                                                            | -4.502992                                                   |
|             |                    | 168                 | 150      | 150      | 98       | 3.432061                   | 69.590584                                                            | -4.488073                                                   |
|             |                    | 168                 | 150      | 152      | 96       | 3.463875                   | 67.83094                                                             | -4.503251                                                   |
|             |                    | 168                 | 152      | 150      | 100      | 3.462075                   | 67.80069                                                             | -4.303906                                                   |
|             |                    | 168                 | 152      | 150      | 98       | 3.462078                   | 67.800591                                                            | -4.303829                                                   |
|             | (t60, t-105)       | 150                 | 70       | 164      | 282      | 3.406589                   | 12.773658                                                            | 4.294664                                                    |
|             |                    | 150                 | 70       | 162      | 284      | 3.377845                   | 12.352449                                                            | 4.294896                                                    |
|             |                    | 150                 | 70       | 162      | 286      | 3.377843                   | 12.352428                                                            | 4.294965                                                    |
|             |                    | 150                 | 68       | 170      | 272      | 3.528294                   | 12.310157                                                            | 4.25356                                                     |
|             |                    | 150                 | 68       | 166      | 278      | 3.468083                   | 11.889872                                                            | 4.254378                                                    |
|             | (t60, t90)         | 150                 | 110      | 172      | 100      | 3.186779                   | 48.69199                                                             | 0.450094                                                    |
|             |                    | 154                 | 110      | 178      | 100      | 3.218281                   | 48.355915                                                            | -0.536775                                                   |
|             |                    | 152                 | 110      | 176      | 100      | 3.216668                   | 48.092655                                                            | -0.04869                                                    |
|             |                    | 150                 | 110      | 174      | 100      | 3.219711                   | 47.444675                                                            | 0.449933                                                    |
|             |                    | 150                 | 108      | 172      | 100      | 3.187747                   | 47.009987                                                            | 0.790515                                                    |

(Table S2 continued)

| Structure * | Rotameric states † | Dihedral angles (°) |          |          |          | $d_{\delta-\gamma}$<br>(Å) | $^{15}\text{N}_{\delta}-^{13}\text{C}_{\gamma}$ | $^1\text{H}-^{15}\text{N}_{\delta}$ |
|-------------|--------------------|---------------------|----------|----------|----------|----------------------------|-------------------------------------------------|-------------------------------------|
|             |                    | His37               |          | Trp41    |          |                            | dipolar                                         | dipolar                             |
|             |                    | $\chi_1$            | $\chi_2$ | $\chi_1$ | $\chi_2$ |                            | (Hz) ‡                                          | (kHz) ¶                             |
| 2           | (t-160, t-105)     | 168                 | 190      | 152      | 288      | 3.541911                   | 48.985104                                       | -0.849826                           |
|             |                    | 168                 | 190      | 152      | 290      | 3.541911                   | 48.985104                                       | -0.849795                           |
|             |                    | 168                 | 190      | 154      | 284      | 3.572264                   | 48.348343                                       | -0.849866                           |
|             |                    | 168                 | 190      | 154      | 286      | 3.572264                   | 48.348343                                       | -0.849917                           |
|             |                    | 168                 | 190      | 154      | 288      | 3.572264                   | 48.348343                                       | -0.849947                           |
|             | (t-160, t90)       | 168                 | 166      | 180      | 94       | 3.590394                   | 53.714424                                       | -4.02628                            |
|             |                    | 168                 | 166      | 180      | 100      | 3.591619                   | 53.655464                                       | -4.02639                            |
|             |                    | 168                 | 166      | 180      | 98       | 3.592683                   | 53.614838                                       | -4.009851                           |
|             |                    | 168                 | 166      | 180      | 96       | 3.593921                   | 53.555267                                       | -4.009737                           |
|             |                    | 168                 | 168      | 180      | 100      | 3.619942                   | 52.427109                                       | -3.807992                           |
|             | (t60, t-105)       | 154                 | 60       | 160      | 286      | 3.419081                   | 6.889967                                        | 3.111437                            |
|             |                    | 154                 | 60       | 160      | 284      | 3.419083                   | 6.889906                                        | 3.111368                            |
|             |                    | 152                 | 60       | 160      | 288      | 3.469284                   | 6.739545                                        | 3.49054                             |
|             |                    | 152                 | 60       | 160      | 286      | 3.469286                   | 6.739475                                        | 3.49042                             |
|             |                    | 152                 | 60       | 160      | 284      | 3.469286                   | 6.739394                                        | 3.490354                            |
|             | (t60, t90)         | 150                 | 110      | 180      | 100      | 3.246675                   | 53.192245                                       | 0.346519                            |
|             |                    | 152                 | 110      | 182      | 100      | 3.256448                   | 52.257214                                       | -0.14916                            |
|             |                    | 150                 | 108      | 180      | 100      | 3.247219                   | 51.662849                                       | 0.688154                            |
|             |                    | 150                 | 110      | 182      | 100      | 3.282577                   | 51.139545                                       | 0.346508                            |
|             |                    | 152                 | 110      | 184      | 100      | 3.292739                   | 50.12907                                        | -0.149172                           |

(Table S2 continued)

| Structure * | Rotameric states † | Dihedral angles (°) |          |          |          | $d_{\delta-\gamma}$<br>(Å) | $^{15}\text{N}_\delta$ - $^{13}\text{C}_\gamma$ | $^1\text{H}$ - $^{15}\text{N}_\delta$ |
|-------------|--------------------|---------------------|----------|----------|----------|----------------------------|-------------------------------------------------|---------------------------------------|
|             |                    | His37               |          | Trp41    |          |                            | dipolar                                         | dipolar                               |
|             |                    | $\chi_1$            | $\chi_2$ | $\chi_1$ | $\chi_2$ |                            | (Hz) ‡                                          | (kHz) ¶                               |
| 3           | (t-160, t-105)     | 166                 | 190      | 154      | 286      | 3.499382                   | 59.375362                                       | -0.848227                             |
|             |                    | 164                 | 190      | 150      | 288      | 3.478864                   | 59.100632                                       | -0.960065                             |
|             |                    | 166                 | 190      | 156      | 284      | 3.532406                   | 58.134926                                       | -0.8482                               |
|             |                    | 164                 | 190      | 152      | 284      | 3.511996                   | 57.940395                                       | -0.960017                             |
|             |                    | 164                 | 190      | 152      | 286      | 3.511996                   | 57.940395                                       | -0.960008                             |
|             | (t-160, t90)       | 168                 | 178      | 172      | 98       | 3.573428                   | 59.77853                                        | -2.483876                             |
|             |                    | 168                 | 178      | 172      | 100      | 3.573428                   | 59.77853                                        | -2.483868                             |
|             |                    | 168                 | 178      | 172      | 94       | 3.57343                    | 59.778473                                       | -2.483879                             |
|             |                    | 168                 | 178      | 172      | 96       | 3.57343                    | 59.778473                                       | -2.483882                             |
|             |                    | 168                 | 180      | 170      | 100      | 3.569917                   | 59.740204                                       | -2.206609                             |
|             | (t60, t-105)       | 150                 | 54       | 160      | 282      | 3.365268                   | 14.540196                                       | 3.350254                              |
|             |                    | 150                 | 54       | 158      | 284      | 3.336036                   | 14.07232                                        | 3.350242                              |
|             |                    | 150                 | 52       | 162      | 278      | 3.431287                   | 13.822364                                       | 3.132428                              |
|             |                    | 150                 | 52       | 160      | 280      | 3.401546                   | 13.45107                                        | 3.132361                              |
|             |                    | 150                 | 52       | 160      | 282      | 3.401546                   | 13.45107                                        | 3.132383                              |
|             | (t60, t90)         | 158                 | 110      | 160      | 100      | 3.163814                   | 76.683212                                       | -2.374692                             |
|             |                    | 156                 | 110      | 160      | 98       | 3.186831                   | 74.55468                                        | -1.974108                             |
|             |                    | 156                 | 110      | 160      | 100      | 3.186831                   | 74.55468                                        | -1.974109                             |
|             |                    | 156                 | 108      | 160      | 98       | 3.171492                   | 74.510368                                       | -1.638909                             |
|             |                    | 156                 | 108      | 160      | 100      | 3.171492                   | 74.510368                                       | -1.63891                              |

(Table S2 continued)

| Structure * | Rotameric states † | Dihedral angles (°) |          |          |          | $d_{\delta-\gamma}$<br>(Å) | $^{15}\text{N}_\delta$ - $^{13}\text{C}_\gamma$ | $^1\text{H}$ - $^{15}\text{N}_\delta$ |
|-------------|--------------------|---------------------|----------|----------|----------|----------------------------|-------------------------------------------------|---------------------------------------|
|             |                    | His37               |          | Trp41    |          |                            | dipolar                                         | dipolar                               |
|             |                    | $\chi_1$            | $\chi_2$ | $\chi_1$ | $\chi_2$ |                            | (Hz) ‡                                          | (kHz) ¶                               |
| 4           | (t-160, t-105)     | 170                 | 170      | 150      | 276      | 3.718826                   | 54.083694                                       | -1.629635                             |
|             |                    | 170                 | 170      | 150      | 274      | 3.718827                   | 54.083652                                       | -1.629588                             |
|             |                    | 170                 | 170      | 150      | 272      | 3.718828                   | 54.08363                                        | -1.629534                             |
|             |                    | 170                 | 170      | 150      | 270      | 3.718828                   | 54.083611                                       | -1.629478                             |
|             |                    | 170                 | 170      | 150      | 268      | 3.718829                   | 54.083569                                       | -1.629423                             |
|             | (t-160, t90)       | 168                 | 150      | 150      | 100      | 3.429518                   | 69.743729                                       | -4.502992                             |
|             |                    | 168                 | 150      | 150      | 98       | 3.432061                   | 69.590584                                       | -4.488073                             |
|             |                    | 168                 | 150      | 152      | 96       | 3.463875                   | 67.83094                                        | -4.503251                             |
|             |                    | 168                 | 152      | 150      | 100      | 3.462075                   | 67.80069                                        | -4.303906                             |
|             |                    | 168                 | 152      | 150      | 98       | 3.462078                   | 67.800591                                       | -4.303829                             |
|             | (t60, t-105)       | 150                 | 60       | 150      | 276      | 3.318503                   | 28.651745                                       | 5.424517                              |
|             |                    | 150                 | 58       | 154      | 270      | 3.396334                   | 27.440521                                       | 5.374725                              |
|             |                    | 150                 | 58       | 152      | 272      | 3.371465                   | 27.191692                                       | 5.374712                              |
|             |                    | 150                 | 58       | 150      | 274      | 3.347325                   | 26.831198                                       | 5.374703                              |
|             |                    | 150                 | 58       | 150      | 276      | 3.347325                   | 26.831198                                       | 5.374708                              |
|             | (t60, t90)         | 158                 | 110      | 160      | 100      | 3.163814                   | 76.683212                                       | -2.374692                             |
|             |                    | 156                 | 110      | 160      | 98       | 3.186831                   | 74.55468                                        | -1.974108                             |
|             |                    | 156                 | 110      | 160      | 100      | 3.186831                   | 74.55468                                        | -1.974109                             |
|             |                    | 156                 | 108      | 160      | 98       | 3.171492                   | 74.510368                                       | -1.638909                             |
|             |                    | 156                 | 108      | 160      | 100      | 3.171492                   | 74.510368                                       | -1.63891                              |

(Table S2 continued)

---

\* The difference between the structures is given by Table S1.

† The rotamer nomenclature of the Penultimate Rotamer Library (6) is used here.

‡ These are  $^{15}\text{N}_\delta\text{-His37-}^{13}\text{C}_\gamma\text{-Trp41}$  dipolar couplings calculated using the same method as in (7). The experimental value is 51.6~74.6 Hz (7). For each state, only the five largest  $^{15}\text{N}_\delta\text{-}^{13}\text{C}_\gamma$  dipolar coupling are presented.

¶ These are  $^1\text{H-}^{15}\text{N}_\delta\text{-His37}$  dipolar coupling calculated using the same method as in (7). The experimental (absolute) value is  $1\pm 0.5$  kHz (7).

---



**Table S3.** Rotamers, structures, and energies of the His-Trp adduct with different conformations.

| MPS           | Initial        |              |              |              |                     |        |          |                |       |              | B3LYP final  |              |                     |        |
|---------------|----------------|--------------|--------------|--------------|---------------------|--------|----------|----------------|-------|--------------|--------------|--------------|---------------------|--------|
|               | His37          |              | Trp41        |              | $d_{\delta-\gamma}$ | Energy | Rotamers |                | His37 |              | Trp41        |              | $d_{\delta-\gamma}$ | Energy |
|               | Rotamers       | $\chi_1$ (°) | $\chi_2$ (°) | $\chi_1$ (°) | $\chi_2$ (°)        | (Å)    | (kcal)   |                |       | $\chi_1$ (°) | $\chi_2$ (°) | $\chi_1$ (°) | $\chi_2$ (°)        | (Å)    |
| $\varepsilon$ | (t-160, t-105) | 170          | 190          | 160          | 280                 | 3.6    | 93.4     | same           | 161   | 200          | 200          | 308          | 4.6                 | 1.6    |
| $\varepsilon$ | (t-160, t90)   | 170          | 180          | 170          | 90                  | 3.6    | 111.9    | (t-160, m95)   | 168   | 200          | 292          | 103          | 4.5                 | 0      |
| $\varepsilon$ | (t60, t-105)   | 150          | 50           | 160          | 280                 | 2.6    | 90.9     | same           | 151   | 96           | 193          | 264          | 3.6                 | 4.2    |
| $\varepsilon$ | (t60, t90)     | 150          | 100          | 210          | 100                 | 3.8    | 86.5     | (t60, m-90)    | 156   | 98           | 248          | 243          | 4.1                 | 3.1    |
| $\delta$      | (t-160, t-105) | 160          | 200          | 160          | 280                 | 3.9    | 98.1     | same           | 157   | 196          | 195          | 257          | 4.6                 | 8.7    |
| $\delta$      | (t-160, t90)   | 170          | 180          | 170          | 90                  | 3.6    | 120.4    | (t-160, t-105) | 150   | 214          | 187          | 248          | 4.9                 | 2.5    |
| $\delta$      | (t60, t-105)   | 150          | 50           | 150          | 280                 | 3.6    | 6.7      | same           | 160   | 20           | 204          | 312          | 4.3                 | 2.5    |
| $\delta$      | (t60, t90)     | 150          | 100          | 210          | 100                 | 3.8    | 89.6     | same           | 147   | 45           | 187          | 97           | 4.0                 | 3.5    |

MPS stands for mono-protonation state. Symbols  $\varepsilon$  and  $\delta$  indicate that the histidine is mono-protonated at its  $\varepsilon$ - and  $\delta$ -nitrogen, respectively.  $D_{\delta-\gamma}$  denotes the distance between the histidine  $\delta$ -nitrogen and the tryptophan  $\gamma$ -carbon atoms. The rotamer nomenclature of the Penultimate Rotamer Library (6) is used here. In each rotamer pair, the first one is for His37 and the second for Trp41. The word “same” in the table indicates that the rotamers are not changed after optimization. All structures were optimized at the B3LYP level of theory with the 6-31G\*\* basis set. The energies are relative to the lowest value.

## REFERENCES

1. Smart, O.S., J. Breed, G.R. Smith, and M.S. Sansom. 1997. A novel method for structure-based prediction of ion channel conductance properties. *Biophys J* 72:1109-1126.
2. Kovacs, F.A., and T.A. Cross. 1997. Transmembrane four-helix bundle of influenza A M2 protein channel: structural implications from helix tilt and orientation. *Biophysical Journal* 73:2511-2517.
3. Kukol, A., P.D. Adams, L.M. Rice, A.T. Brunger, and T.I. Arkin. 1999. Experimentally based orientational refinement of membrane protein models: A structure for the Influenza A M2 H<sup>+</sup> channel. *Journal of Molecular Biology* 286:951-962.
4. Song, Z., F.A. Kovacs, J. Wang, J.K. Denny, S.C. Shekar, J.R. Quine, and T.A. Cross. 2000. Transmembrane domain of M2 protein from influenza A virus studied by solid-state <sup>15</sup>N polarization inversion spin exchange at magic angle NMR. *Biophysical Journal* 79:767-775.
5. Wang, J., S. Kim, F. Kovacs, and T.A. Cross. 2001. Structure of the transmembrane region of the M2 protein H<sup>+</sup> channel. *Protein Science* 10:2241-2250.
6. Lovell, S.C., J.M. Word, J.S. Richardson, and D.C. Richardson. 2000. The penultimate rotamer library. *PROTEINS: Structure, Function, and Genetics* 40:389-408.
7. Nishimura, K., S. Kim, L. Zhang, and T.A. Cross. 2002. The closed state of a H<sup>+</sup> channel helical bundle combining precise orientational and distance restraints from solid state NMR. *Biochemistry* 41:13170-13177.
